# Supplementary material for: Antidepressant medication use among working age first-generation migrants resident in Finland: an administrative data linkage study
Source: Int J Equity Health. 2019 Oct 16;18:157. doi: 10.1186/s12939-019-1060-9 (PMC6794854; doi:10.1186/s12939-019-1060-9)
Supplement: Supplementary file 1 — Additional file 1: Table S1. Descriptive statistics showing area of residence by country or region of birth. [file 12939_2019_1060_MOESM1_ESM.docx]

| **Country of region of birth** | **Residence in capital**  **(n%)** | **Residence outside of capital**  **(n%)** |
| --- | --- | --- |
| Finland | | 289254 | | --- | | 28.01 | | | 743438 | | --- | | 71.99 | |
| Russia/USSR | | 3923 | | --- | | 43.57 | | | 5080 | | --- | | 56.43 | |
| Estonia | | 1478 | | --- | | 60.75 | | | 955 | | --- | | 39.25 | |
| Sweden | | 459 | | --- | | 31.63 | | | 992 | | --- | | 68.37 | |
| Eastern EU | | 576 | | --- | | 53.14 | | | 508 | | --- | | 46.86 | |
| Former Yugoslavia | | 674 | | --- | | 45.98 | | | 792 | | --- | | 54.02 | |
| Western Europe | | 1397 | | --- | | 53.65 | | | 1207 | | --- | | 46.35 | |
| Other Western | | 273 | | --- | | 56.06 | | | 214 | | --- | | 43.94 | |
| North Afria/ Middle East | | 1763 | | --- | | 48.95 | | | 1839 | | --- | | 51.05 | |
| Sub-Saharan Africa | | 646 | | --- | | 62.84 | | | 382 | | --- | | 37.16 | |
| America | | 778 | | --- | | 87.42 | | | 112 | | --- | | 12.58 | |
| South Asia | | 529 | | --- | | 75.04 | | | 176 | | --- | | 24.96 | |
| East Asia | | 1224 | | --- | | 61.79 | | | 757 | | --- | | 38.21 | |

Table S1: Descriptive statistics showing area of residence by country or region of birth

X2 for all cases p<.001
